# Supplementary material for: Lewis and Brønsted multifunctionality: an unusual heterocycle from the reaction of bis(pentafluorophenyl)borinic acid with nitriles
Source: Royal Society of Chemistry journal article supplement (doi:10.1039/b516262a), 2006-01-01
Supplement: b516262a.pdf [file b516262a.pdf]

**Supplementary Data — X-Ray Crystallography**

**Lewis and Brønsted Multifunctionality: An Unusual Heterocycle from the Reaction of Bis(pentafluorophenyl)borinic Acid with Nitriles**

George J.P. Britovsek, Juri Ugolotti, Patricia Hunt and Andrew J.P. White

**Fig. S1** The molecular structure of one (**B**) of the two independent molecules present in the crystals of **2a**.

**Fig. S2** The molecular structure of one (**A**) of the two independent molecules present in the crystals of **2a** (20% probability ellipsoids).

**Fig. S3** The molecular structure of one (**B**) of the two independent molecules present in the crystals of **2a** (20% probability ellipsoids).

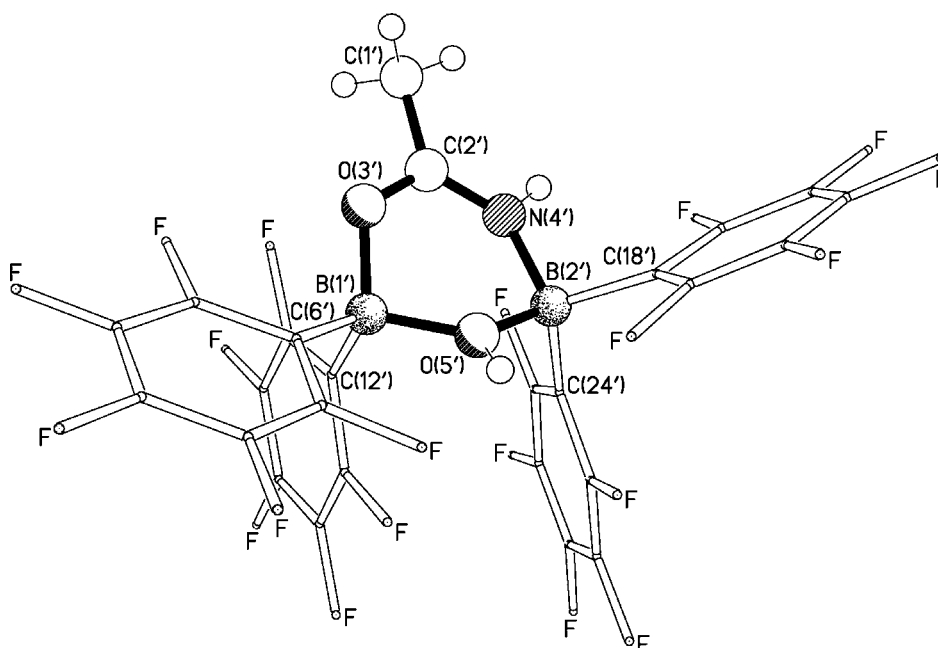

Fig. S1

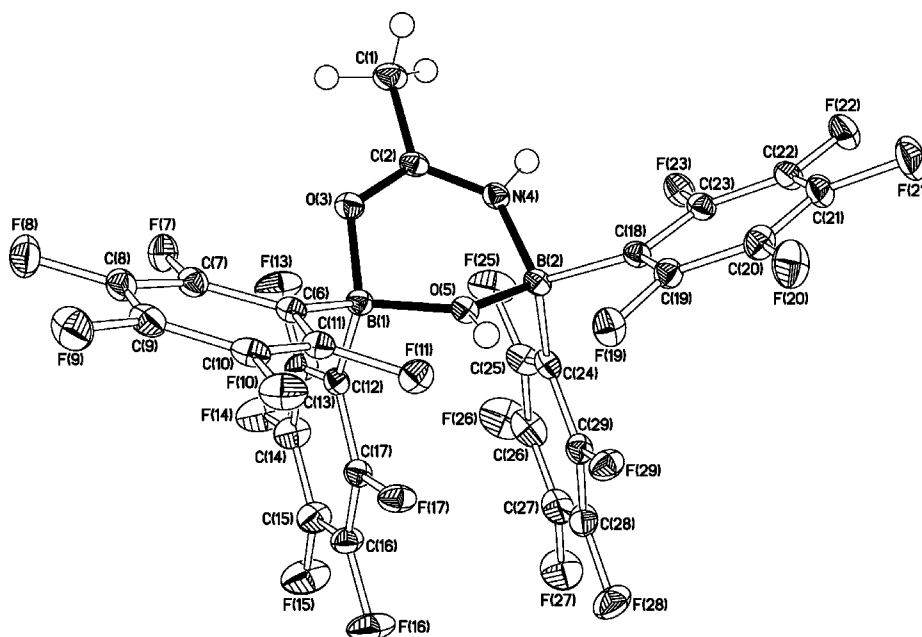

Fig. S2

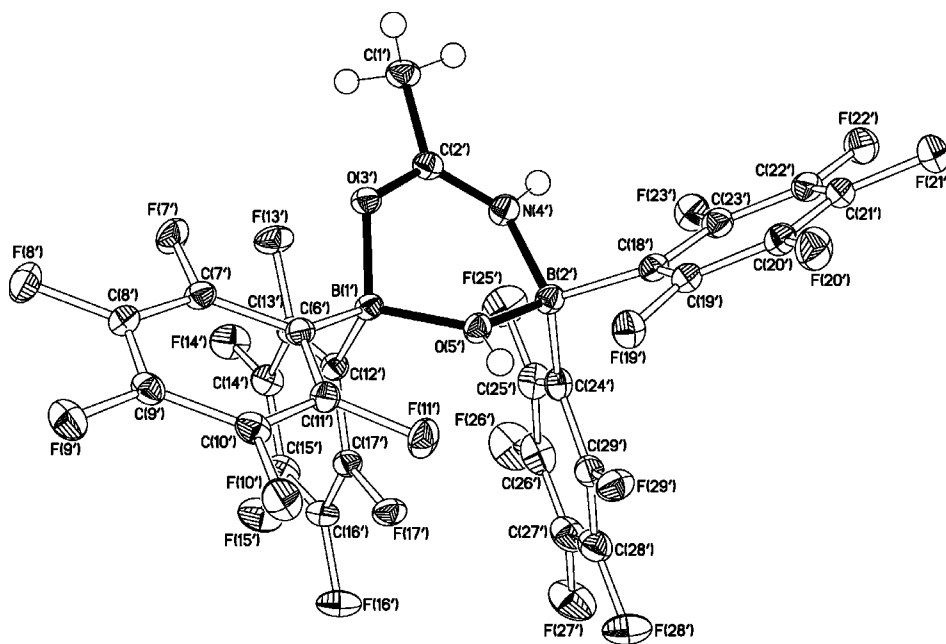

Fig. S3
